# Supplementary material for: Visualizing temperature inhomogeneity using thermo-responsive smart materials
Source: Royal Society of Chemistry journal article supplement (doi:10.1039/d3mh01198d), 2023-01-01
Supplement: d3mh01198d1.pdf [file d3mh01198d1.pdf]

## Supporting Information

# Visualizing Temperature Inhomogeneity Using Thermo-Responsive Smart Materials

*Panqin Wang*<sup>a</sup>, *Jiaren Du*<sup>a\*</sup>, *Tengyue Wang*<sup>a</sup>, *Shaoxing Lyu*<sup>a</sup>, *Rik Van Deun*<sup>b</sup>, *Dirk Poelman*<sup>c,d</sup> and *Hengwei Lin*<sup>a\*</sup>

### AUTHOR ADDRESS

<sup>a</sup> International Joint Research Center for Photo-responsive Molecules and Materials, School of Chemical and Material Engineering, Jiangnan University, 214122, Wuxi, China;

<sup>b</sup> L<sup>3</sup>-Luminescent Lanthanide Lab, Department of Chemistry, Ghent University, Krijgslaan 281-S3, B-9000 Ghent, Belgium.

<sup>c</sup> LumiLab, Department of Solid State Sciences, Ghent University, Krijgslaan 281-S1, B-9000, Ghent, Belgium.

<sup>d</sup> Center for Nano- and Biophotonics (NB-Photonics), Ghent University, B-9000, Ghent, Belgium.

### AUTHOR INFORMATION

#### **\*Corresponding authors:**

**Dr. Jiaren Du** ([jiaren.du@jiangnan.edu.cn](mailto:jiaren.du@jiangnan.edu.cn))

**Prof. Hengwei Lin** ([linhengwei@jiangnan.edu.cn](mailto:linhengwei@jiangnan.edu.cn))

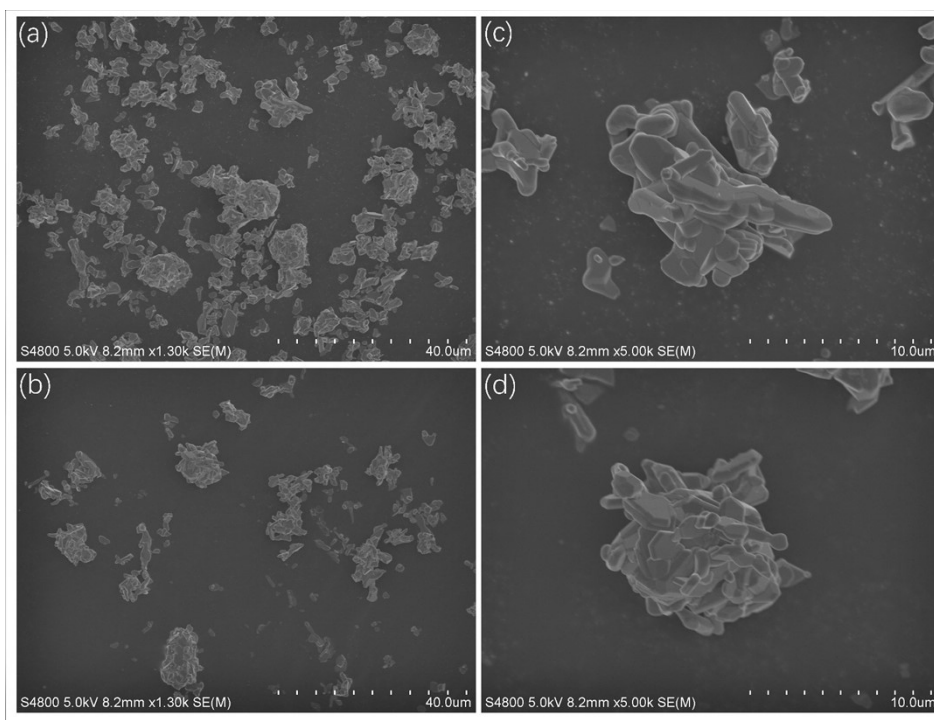

**Figure S1.** SEM morphology of  $\text{SrGa}_{12-x}\text{Al}_x\text{O}_{19}:4\%\text{Dy}^{3+}$  ( $x=3$ ) phosphor of the selected area with varied scales (a)-(b) 40  $\mu\text{m}$ , and (c)-(d) 10  $\mu\text{m}$ , respectively.

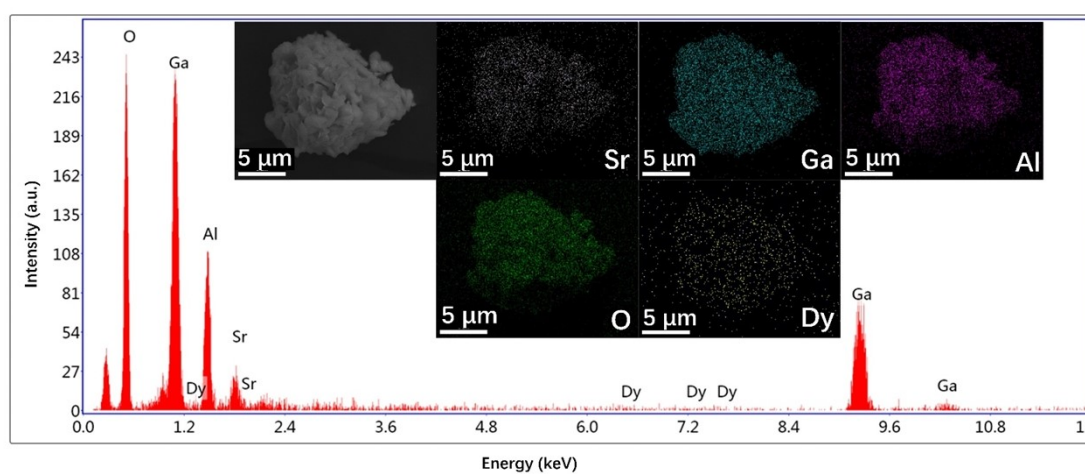

**Figure S2.** EDS elemental mappings of  $\text{SrGa}_{12-x}\text{Al}_x\text{O}_{19}:4\%\text{Dy}^{3+}$  ( $x=3$ ) phosphor. Elemental mapping images of Sr, Ga, Al, O and Dy for the selected microparticle.

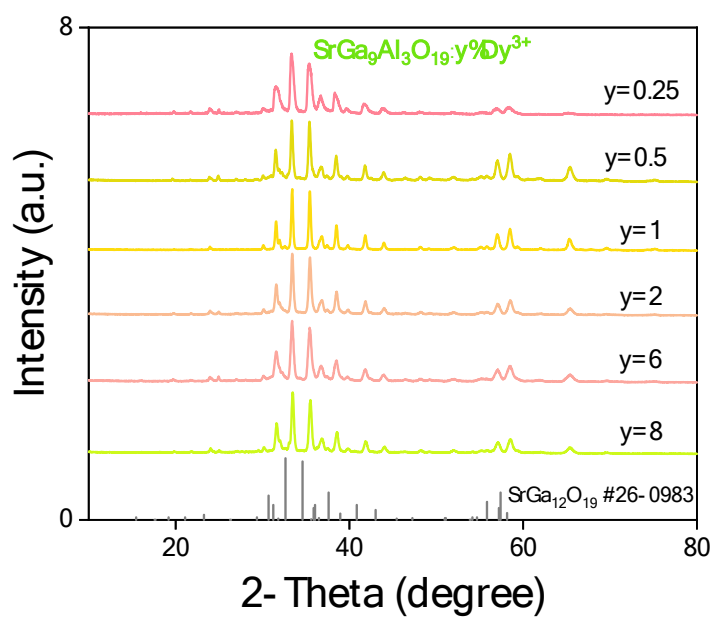

**Figure S3.** XRD patterns of SrGa<sub>9</sub>Al<sub>3</sub>O<sub>19</sub>:y%Dy<sup>3+</sup> samples. Dy<sup>3+</sup> concentration is 0.25%, 0.5%, 1%, 2%, 6%, 8%, respectively.

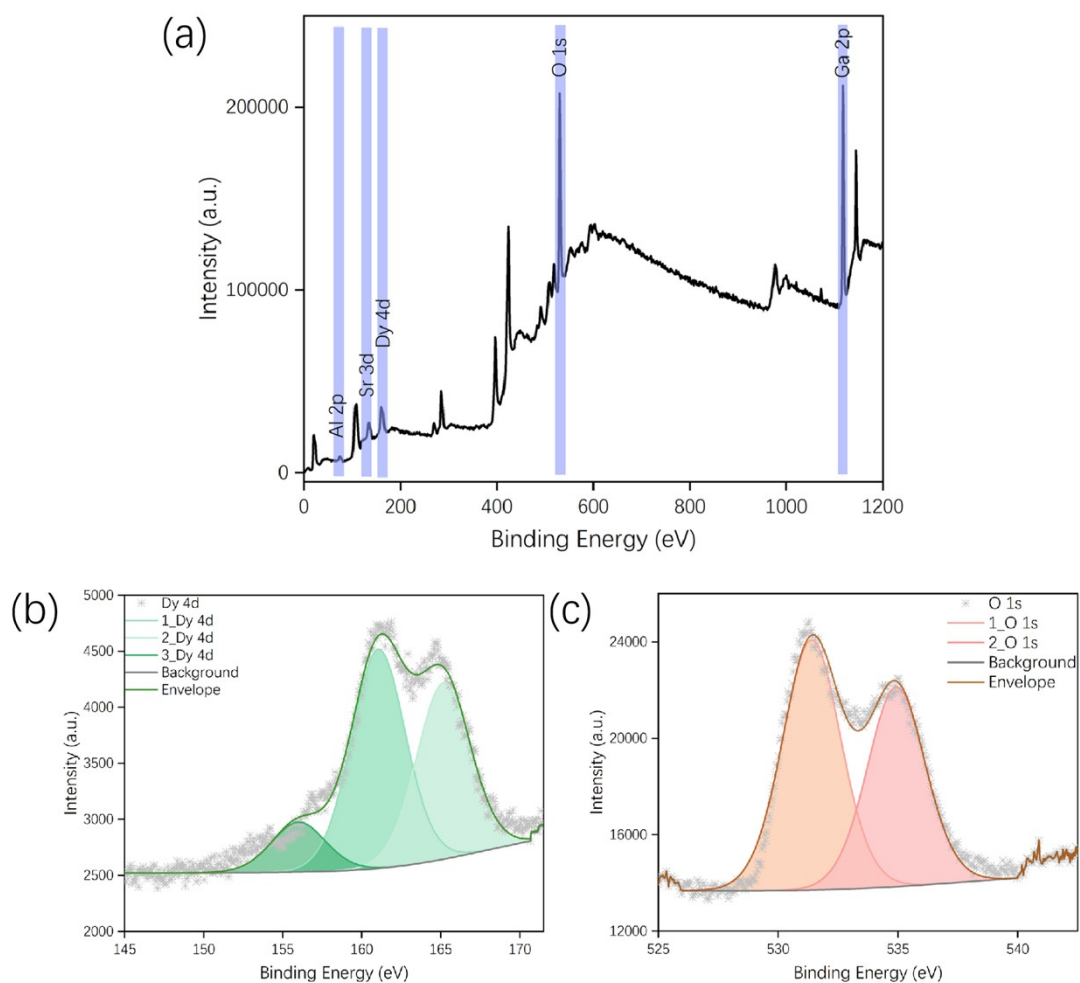

**Figure S4.** XPS survey of  $\text{SrGa}_{12-x}\text{Al}_x\text{O}_{19}:4\%\text{Dy}^{3+}$  ( $x=3$ ). (a) The whole spectrum of  $\text{SrGa}_{12-x}\text{Al}_x\text{O}_{19}:4\%\text{Dy}^{3+}$  ( $x=3$ ). Magnified XPS peaks with fitting curves for Dy (b) and O (c) from the  $\text{SrGa}_{12-x}\text{Al}_x\text{O}_{19}:4\%\text{Dy}^{3+}$  ( $x=3$ ) phosphor.

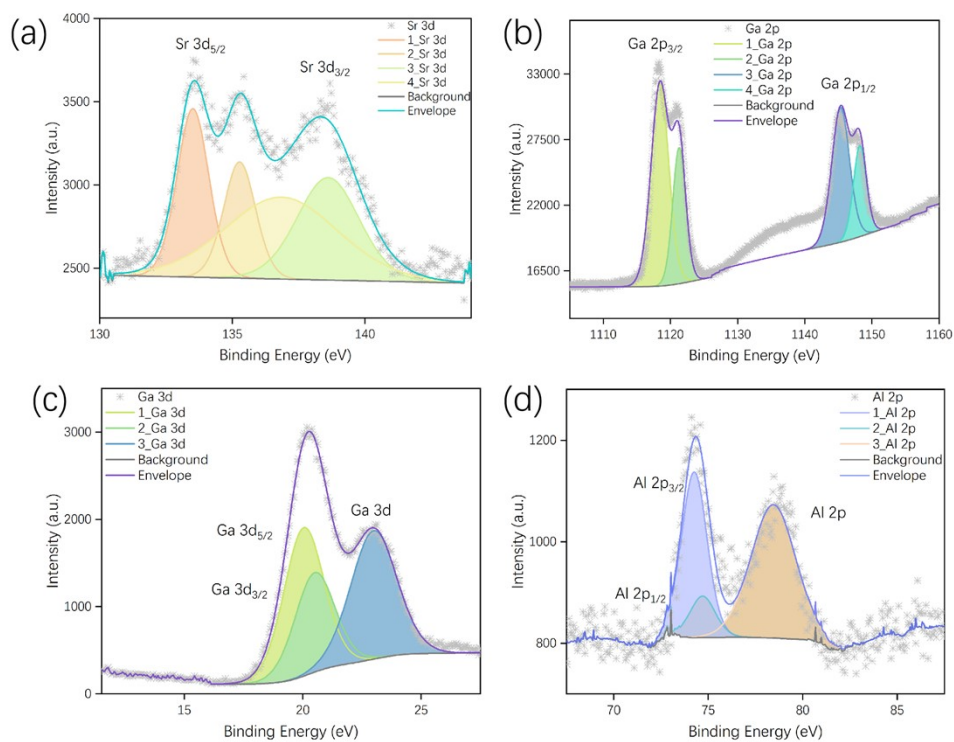

**Figure S5.** Magnified XPS peaks with fitting curves for Sr 3d (a), Ga 2p (b), Ga 3d (c), Al 2p (d) in  $\text{SrGa}_{12-x}\text{Al}_x\text{O}_{19}:\text{4\%Dy}^{3+}$  ( $x=3$ ) phosphor.

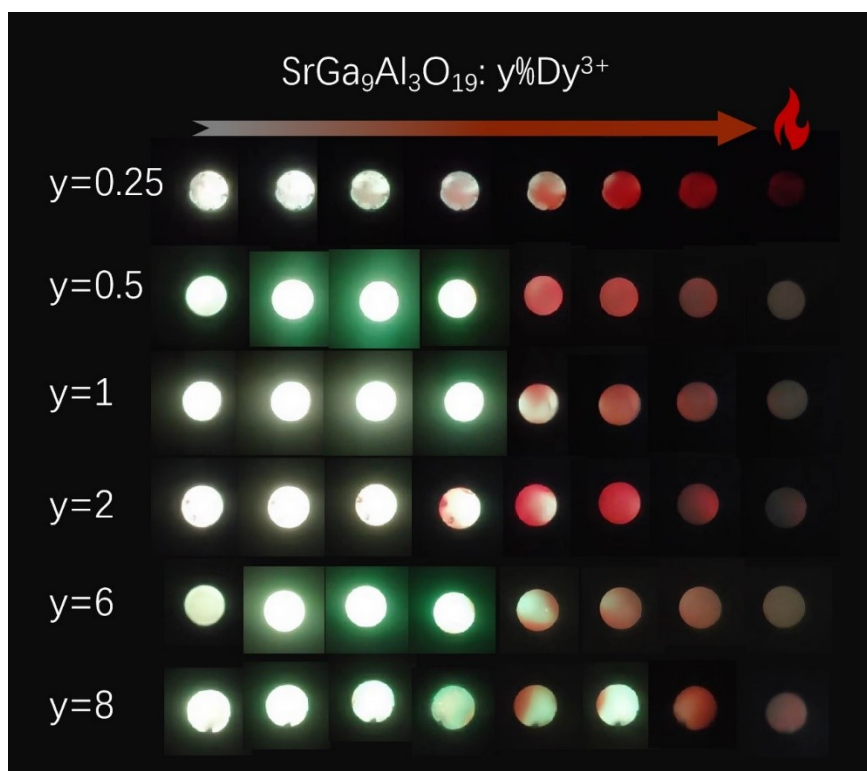

**Figure S6.** Photographs of thermally stimulated luminescence of  $\text{SrGa}_9\text{Al}_3\text{O}_{19}:\text{y\%Dy}^{3+}$  ( $y = 0.25\%, 0.5\%, 1\%, 2\%, 6\%, 8\%$ ) after 254 nm pre-irradiation at room temperature.

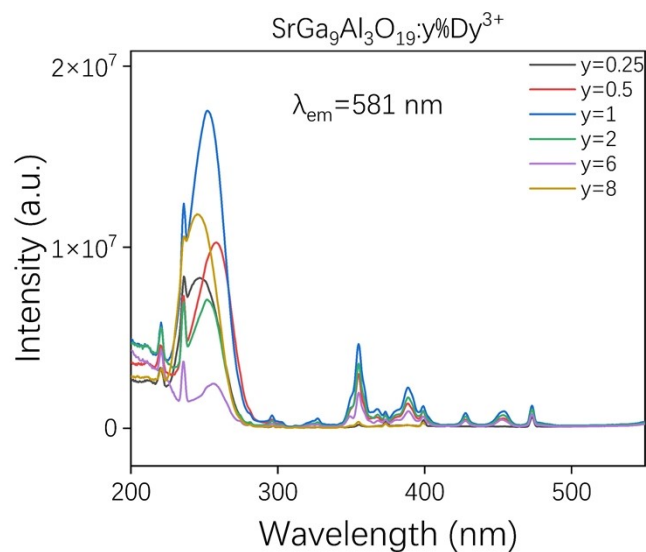

**Figure S7.** PLE spectra of  $\text{SrGa}_9\text{Al}_3\text{O}_{19}:\text{y}\%\text{Dy}^{3+}$  samples. PLE spectra were monitored at emission of 581 nm.

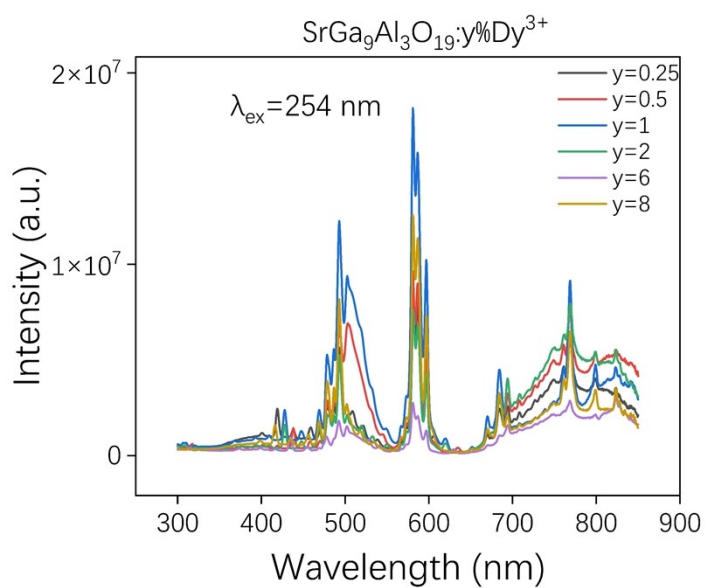

**Figure S8.** PL spectra of  $\text{SrGa}_9\text{Al}_3\text{O}_{19}:\text{y}\%\text{Dy}^{3+}$  samples. PL spectra were collected upon 254 nm excitation.

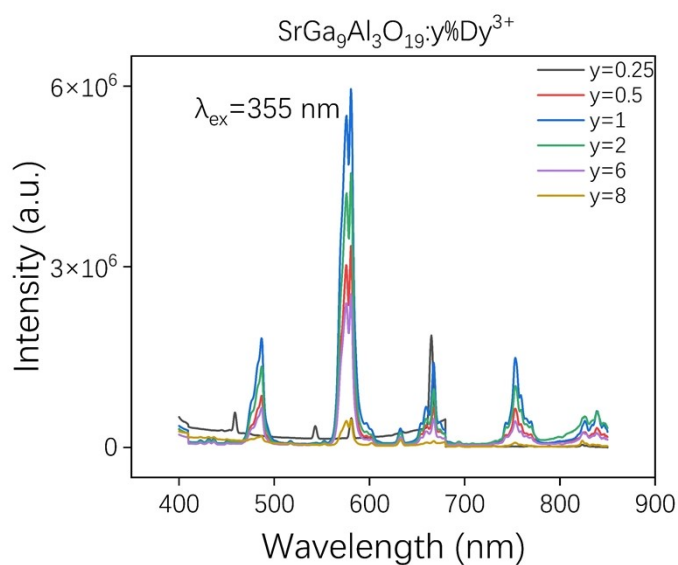

**Figure S9.** PL spectra of  $\text{SrGa}_9\text{Al}_3\text{O}_{19}:\text{y}\%\text{Dy}^{3+}$  samples. PL spectra were collected upon 355 nm excitation.

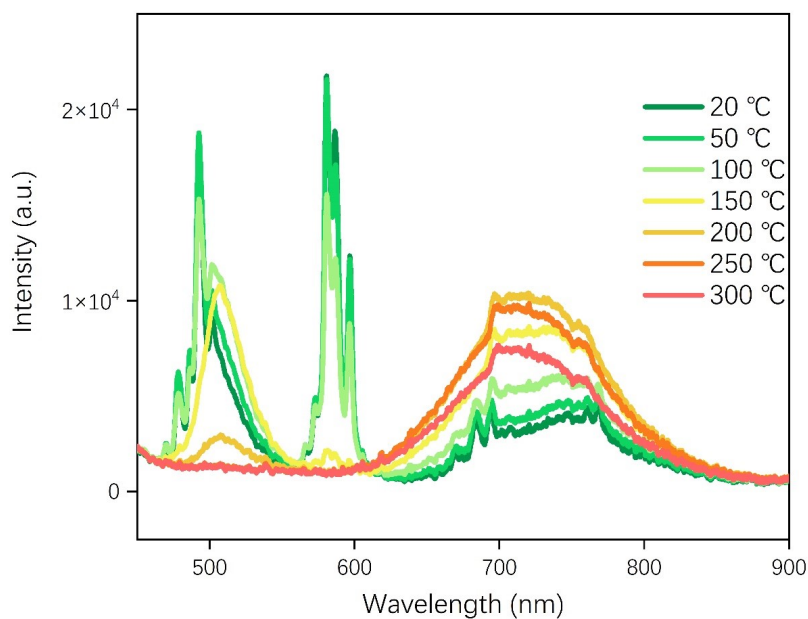

**Figure S10.** Temperature dependent emission from  $\text{SrGa}_{12-x}\text{Al}_x\text{O}_{19}:\text{4}\%\text{Dy}^{3+}$  ( $x=2$ ) phosphor upon 254 nm excitation. The ambient temperature was varied from 20 °C to 300 °C.

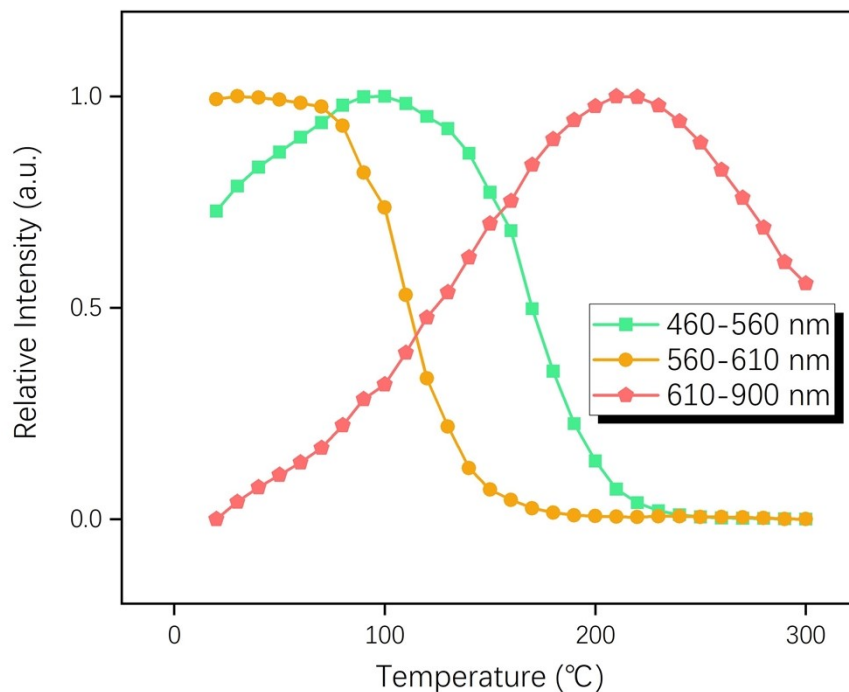

**Figure S11.** Integrated intensity of emissions in three wavelength regions of  $\text{SrGa}_{12-x}\text{Al}_x\text{O}_{19}:4\%\text{Dy}^{3+}$  ( $x=2$ ) phosphor. The ambient temperature was varied from 20 °C to 300 °C, and the wavelength region was divided into 460-560 nm, 560-610 nm, and 610-900 nm, respectively.

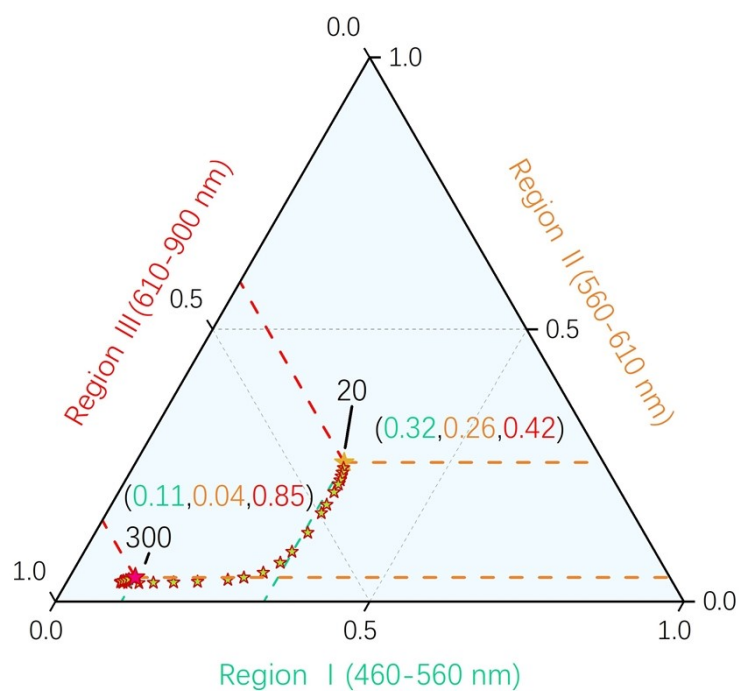

**Figure S12.** Relative proportion among three wavelength regions of  $\text{SrGa}_{12-x}\text{Al}_x\text{O}_{19}:4\%\text{Dy}^{3+}$  ( $x=2$ ) phosphor at varied temperatures.



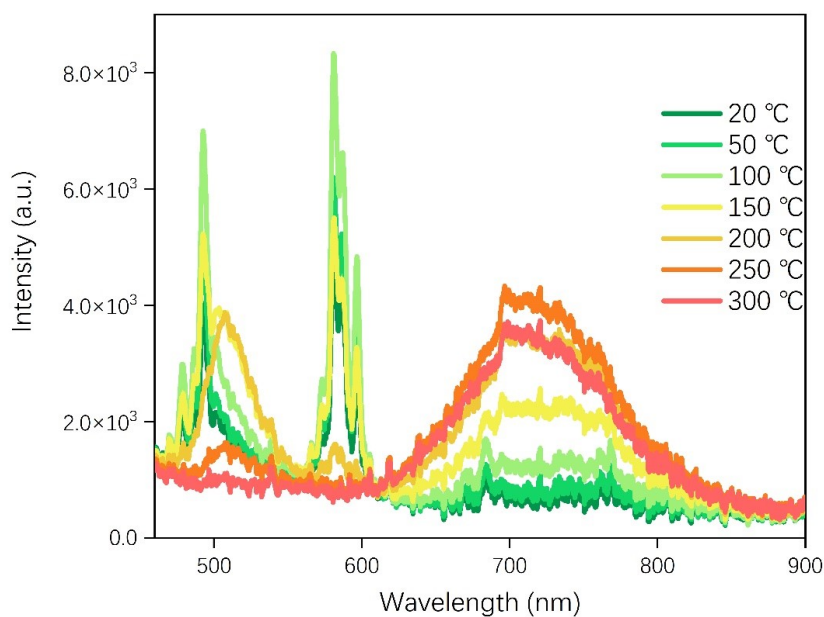

**Figure S13.** Temperature dependent emission from  $\text{SrGa}_{12-x}\text{Al}_x\text{O}_{19}:4\%\text{Dy}^{3+}$  ( $x=3$ ) phosphor upon 254 nm excitation. The ambient temperature was varied from 20 °C to 300 °C.

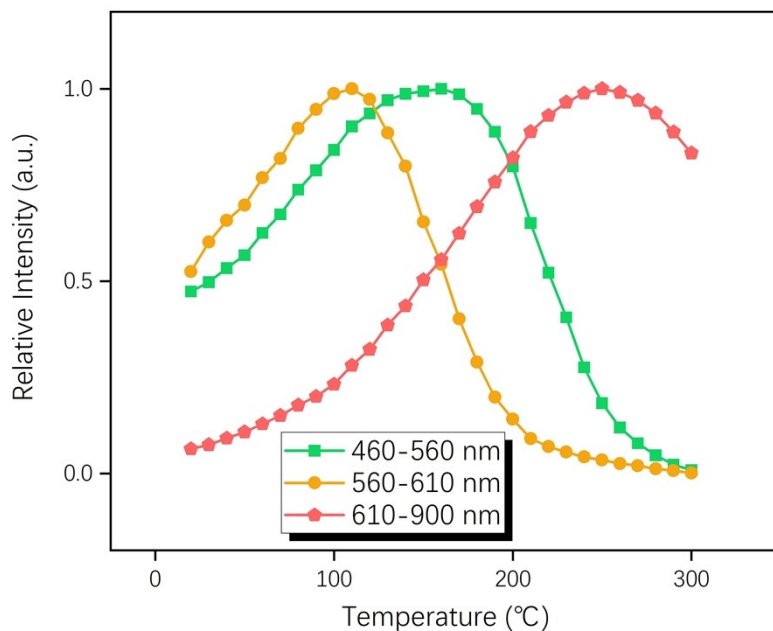

**Figure S14.** Integrated intensity of emissions in three wavelength regions of  $\text{SrGa}_{12-x}\text{Al}_x\text{O}_{19}:4\%\text{Dy}^{3+}$  ( $x=3$ ) phosphor. The ambient temperature was varied from 20 °C to 300 °C, and the wavelength region was divided into 460-560 nm, 560-610 nm, and 610-900 nm, respectively.

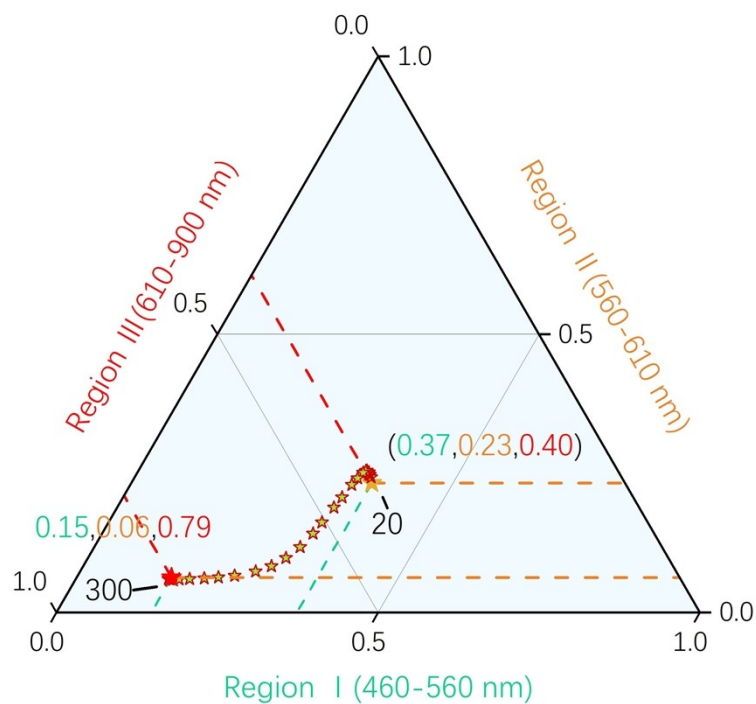

**Figure S15.** Relative proportion among three wavelength regions of  $\text{SrGa}_{12-x}\text{Al}_x\text{O}_{19}:4\%\text{Dy}^{3+}$  ( $x=3$ ) phosphor at varied temperatures.

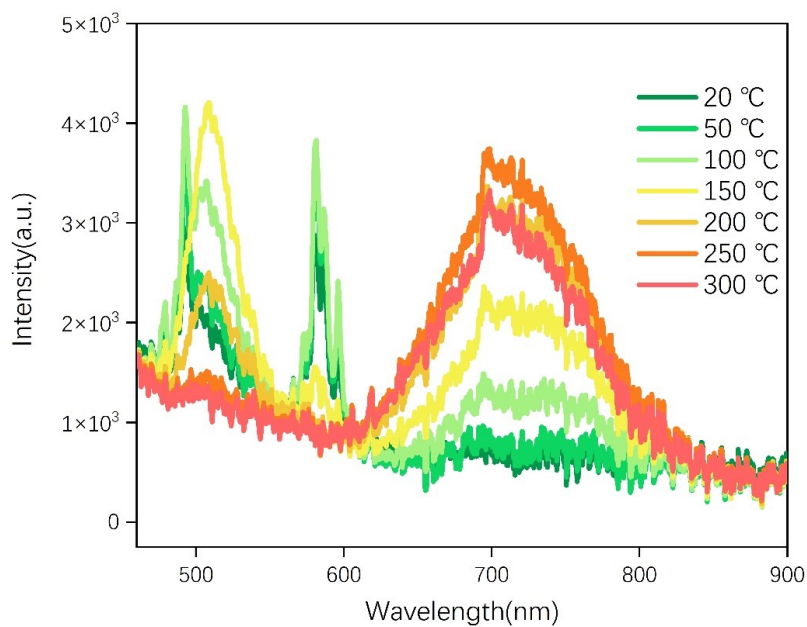

**Figure S16.** Temperature dependent emission from  $\text{SrGa}_{12-x}\text{Al}_x\text{O}_{19}:4\%\text{Dy}^{3+}$  ( $x=4$ ) phosphor upon 254 nm excitation. The ambient temperature was varied from 20 °C to 300 °C.

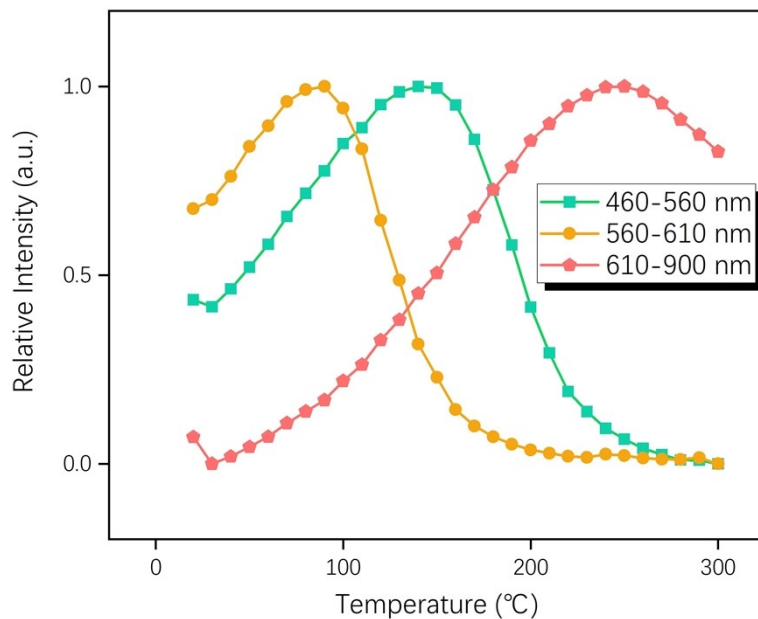

**Figure S17.** Integrated intensity of emissions in three wavelength regions of  $\text{SrGa}_{12-x}\text{Al}_x\text{O}_{19}:4\%\text{Dy}^{3+}$  ( $x=4$ ) phosphor. The ambient temperature was varied from 20 °C to 300 °C, and the wavelength region was divided into 460-560 nm, 560-610 nm, and 610-900 nm, respectively.

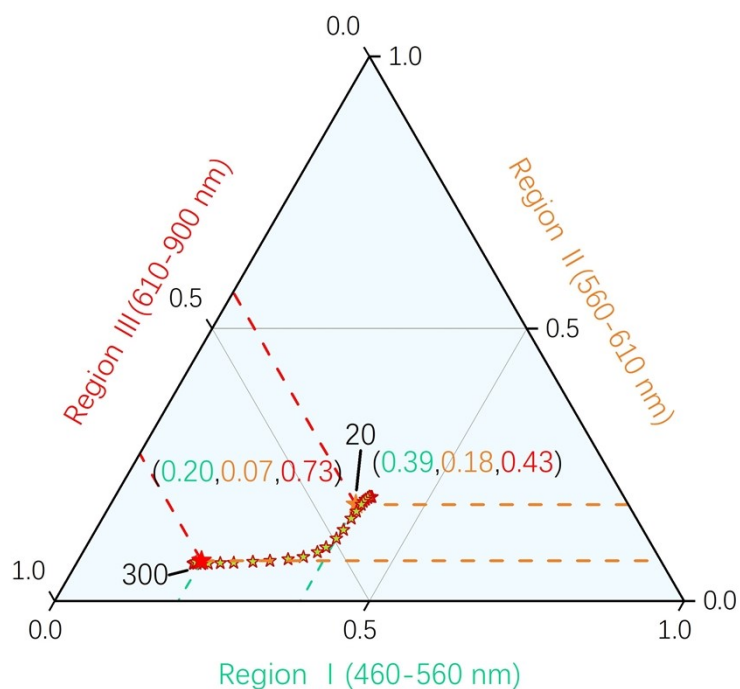

**Figure S18.** Relative proportion among three wavelength regions of  $\text{SrGa}_{12-x}\text{Al}_x\text{O}_{19}:4\%\text{Dy}^{3+}$  ( $x=4$ ) phosphor at varied temperatures.

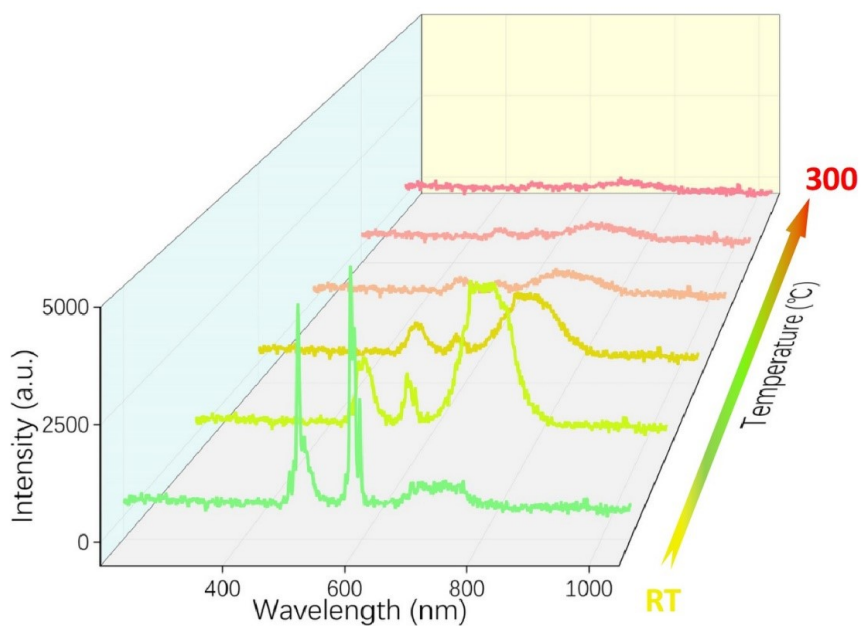

**Figure S19.** Thermally stimulated luminescence spectra of SrGa<sub>12-x</sub>Al<sub>x</sub>O<sub>19</sub>:4%Dy<sup>3+</sup> (x=2) after 254 nm irradiation.

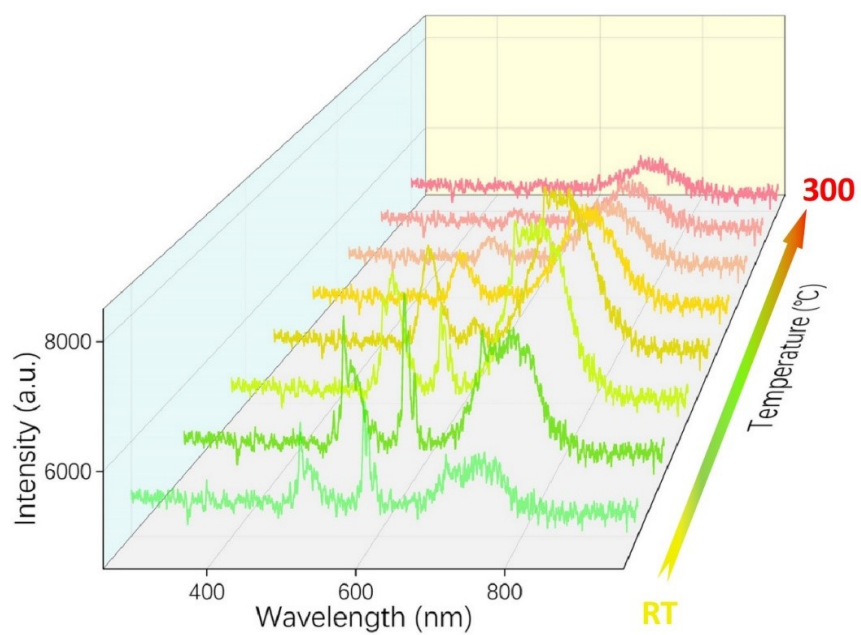

**Figure S20.** Thermally stimulated luminescence spectra of SrGa<sub>12-x</sub>Al<sub>x</sub>O<sub>19</sub>:4%Dy<sup>3+</sup> (x=3) after 254 nm irradiation.

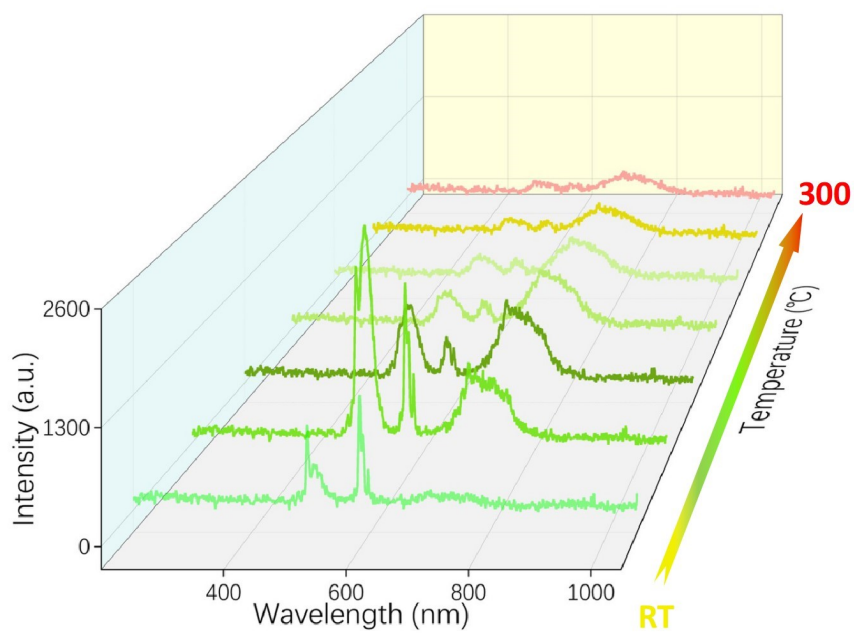

**Figure S21.** Thermally stimulated luminescence spectra of  $\text{SrGa}_{12-x}\text{Al}_x\text{O}_{19}:4\%\text{Dy}^{3+}$  ( $x=4$ ) after 254 nm irradiation.

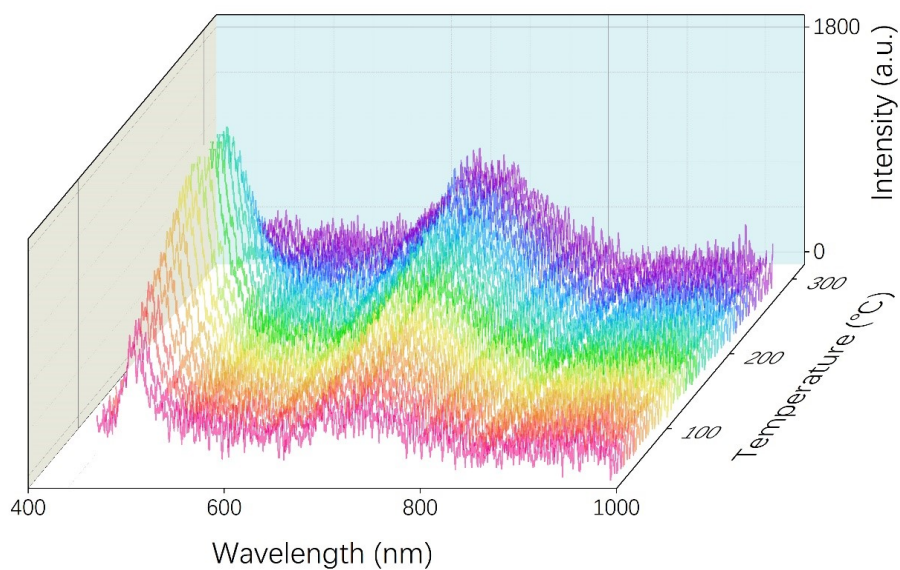

**Figure S22.** PL spectra of  $\text{SrGa}_{12-x}\text{Al}_x\text{O}_{19}$  ( $x=2$ ) at different temperatures under 254 nm excitation.

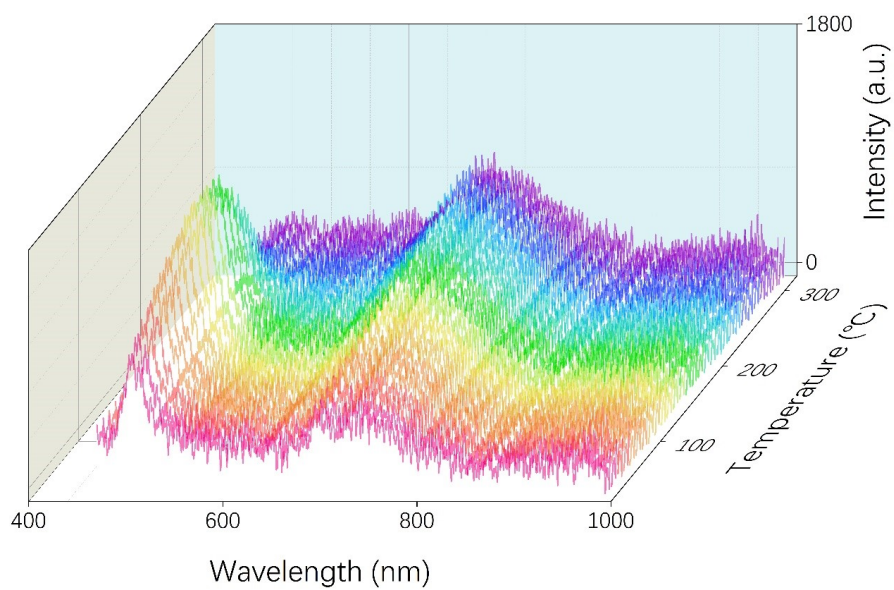

**Figure S23.** PL spectra of SrGa<sub>12-x</sub>Al<sub>x</sub>O<sub>19</sub> (x=3) at different temperatures under 254 nm excitation.

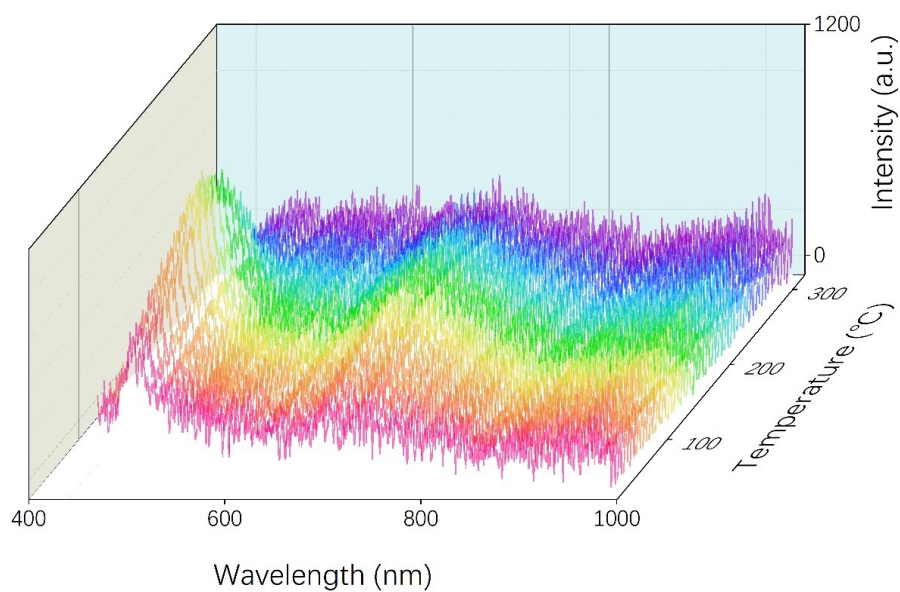

**Figure S24.** PL spectra of SrGa<sub>12-x</sub>Al<sub>x</sub>O<sub>19</sub> (x=4) at different temperatures under 254 nm excitation.



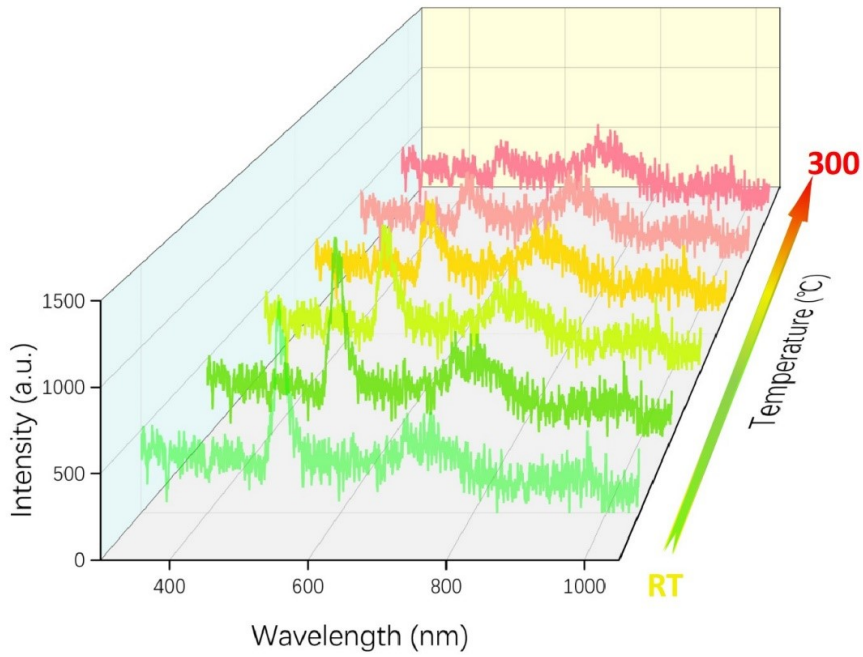

**Figure S25.** Thermally stimulated luminescence spectra of SrGa<sub>12-x</sub>Al<sub>x</sub>O<sub>19</sub> (x=3) after 254 nm irradiation.

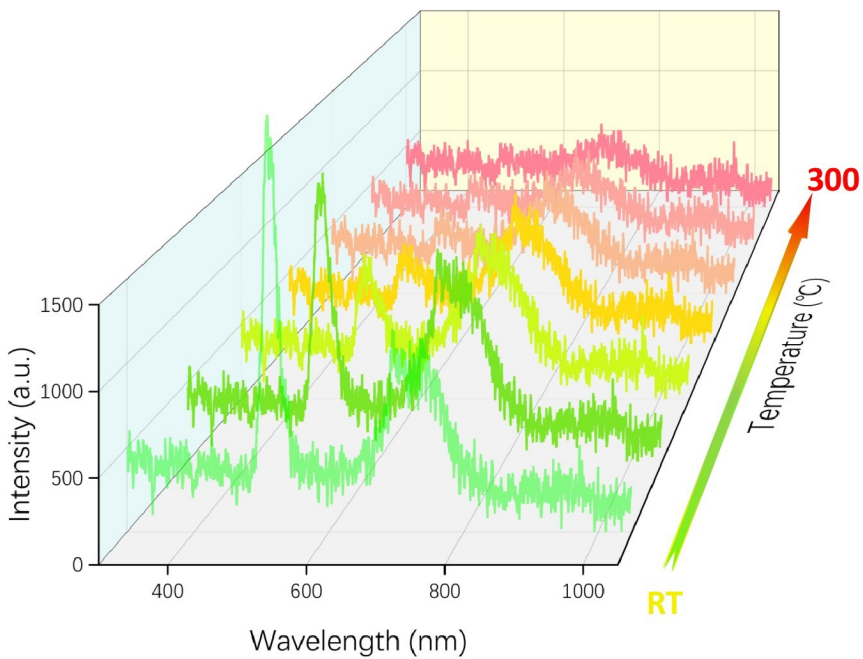

**Figure S26.** Thermally stimulated luminescence spectra of SrGa<sub>12-x</sub>Al<sub>x</sub>O<sub>19</sub> (x=4) after 254 nm irradiation.

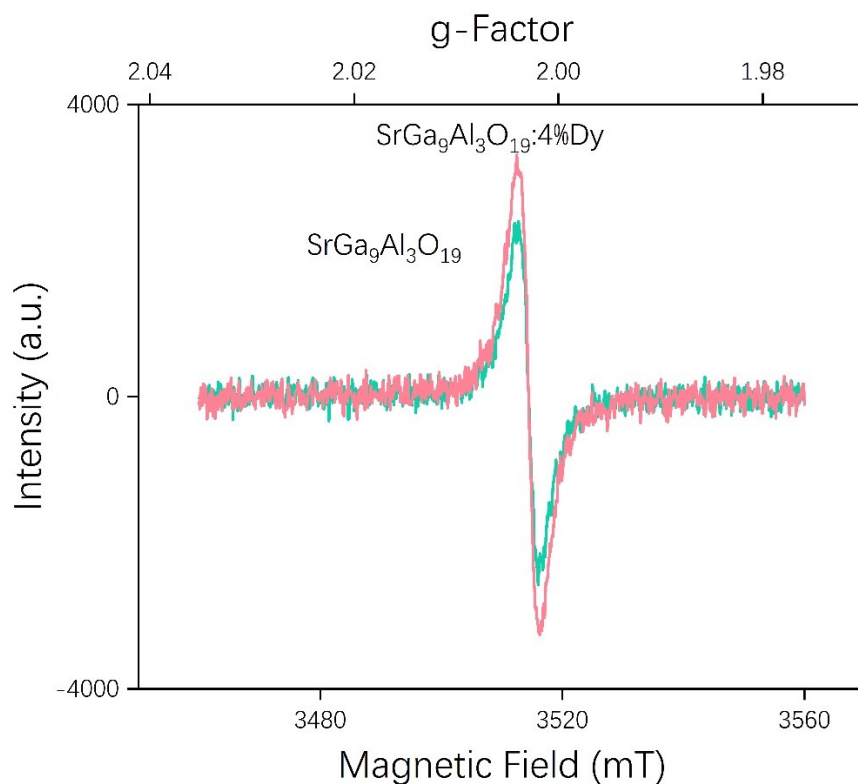

**Figure S27.** EPR spectra of  $\text{SrGa}_{12-x}\text{Al}_x\text{O}_{19}$  ( $x=3$ , green curve) and  $\text{SrGa}_{12-x}\text{Al}_x\text{O}_{19}: 4\%\text{Dy}^{3+}$  ( $x=3$ , red curve).

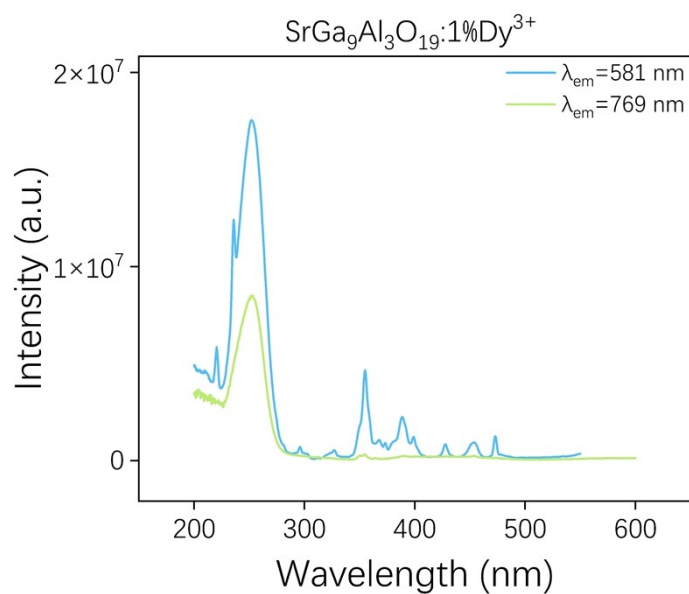

**Figure S28.** The comparison of excitation spectrum of the different emission features ( $\lambda_{\text{em}}=769$  nm for the host emission and  $\lambda_{\text{em}}=581$  nm for  $\text{Dy}^{3+}$  emission).



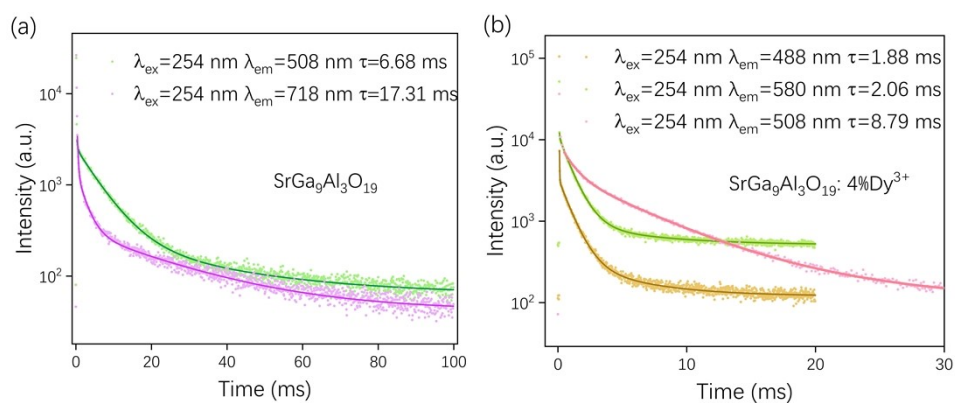

**Figure S29.** Luminescence decay curves of  $\text{SrGa}_{12-x}\text{Al}_x\text{O}_{19}$  ( $x=3$ ) and  $\text{SrGa}_{12-x}\text{Al}_x\text{O}_{19}:4\%\text{Dy}^{3+}$  ( $x=3$ ) upon the 254 nm excitation.

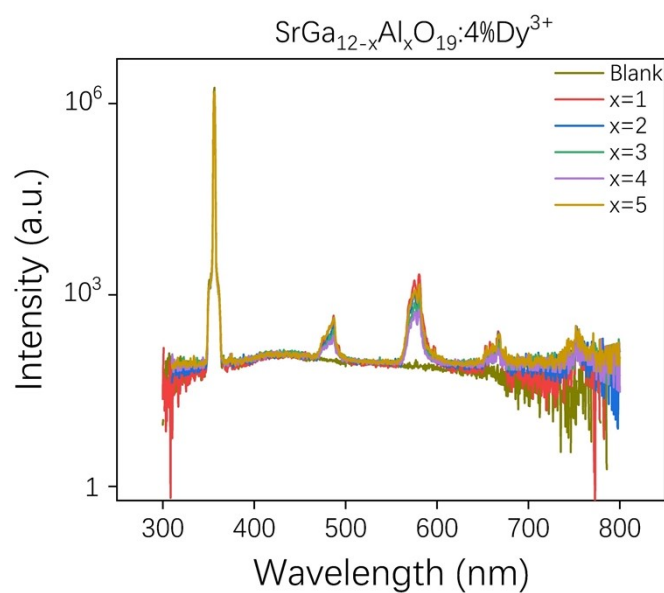

**Figure S30.** The photoluminescence quantum yield (PLQY) of  $\text{SrGa}_{12-x}\text{Al}_x\text{O}_{19}:\text{Dy}^{3+}$  phosphors ( $x=1, 2, 3, 4, 5$ )

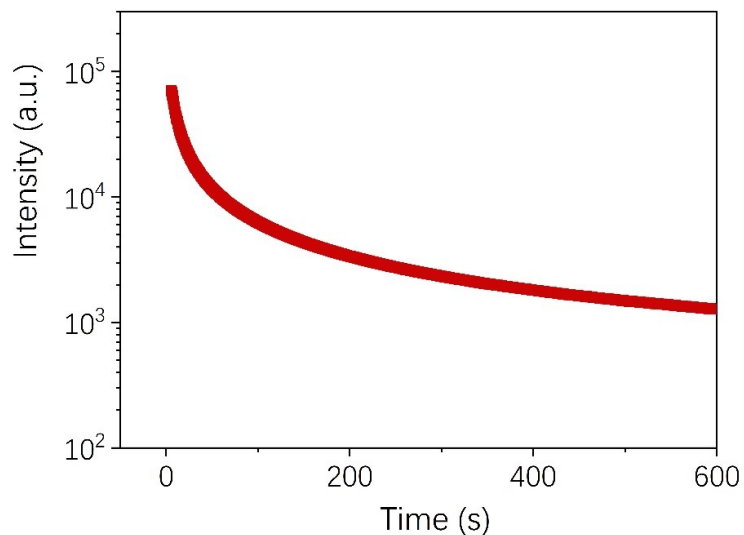

**Figure S31.** Persistent luminescence decay curve of  $\text{SrGa}_{12-x}\text{Al}_x\text{O}_{19}: 4\%\text{Dy}^{3+}$  ( $x=3$ ) after 254 nm excitation.

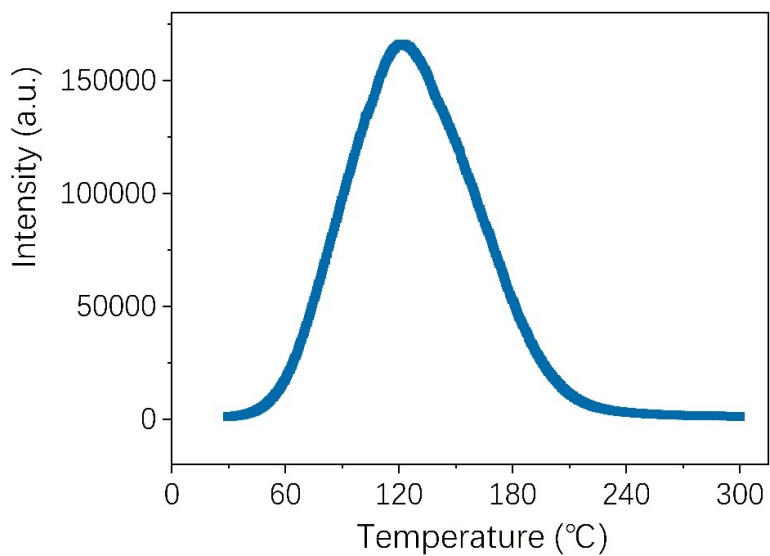

**Figure S32.** TL glow curves of  $\text{SrGa}_{12-x}\text{Al}_x\text{O}_{19}: 4\%\text{Dy}^{3+}$  ( $x=3$ ) after 254 nm excitation.

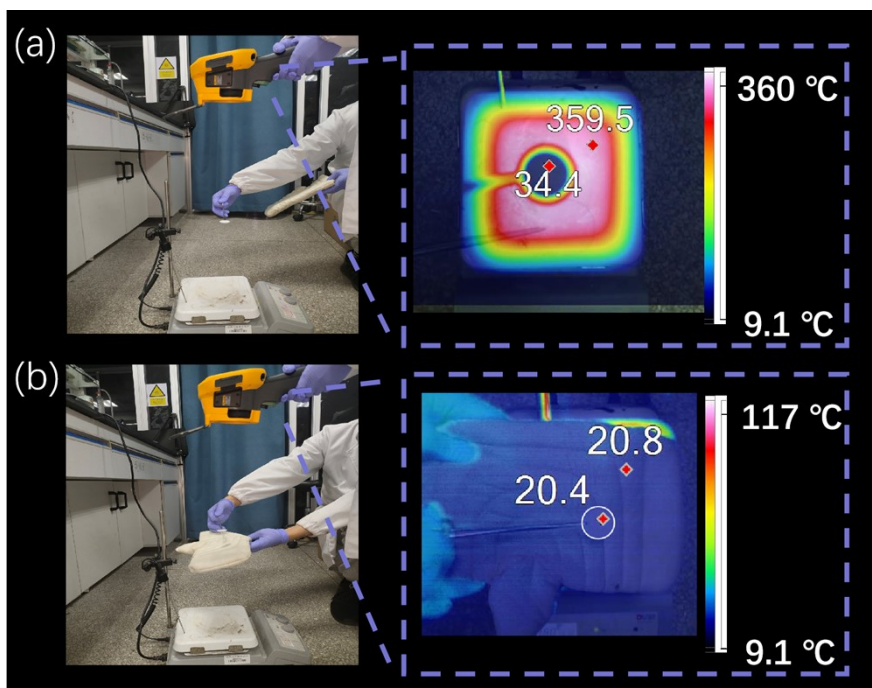

**Figure S33.** Demonstration of the measured distribution of thermal fields via infrared thermal imager at a high-temperature background (360 °C) or a shielded room-temperature background.

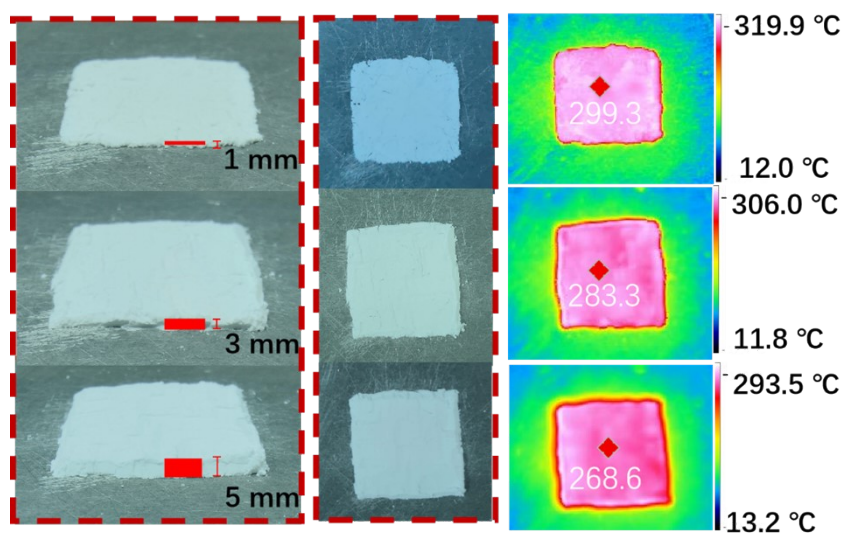

**Figure S34.** Temperature sensitivity of the  $\text{SrGa}_{12-x}\text{Al}_x\text{O}_{19}: 4\%\text{Dy}^{3+}$  ( $x=3$ ) phosphor. Thickness of the phosphor film was made at around 1 mm, 2 mm, and 5 mm, respectively. Demonstration of the measured distribution of thermal fields was performed via infrared thermal imager at ambient backgrounds (300 °C).

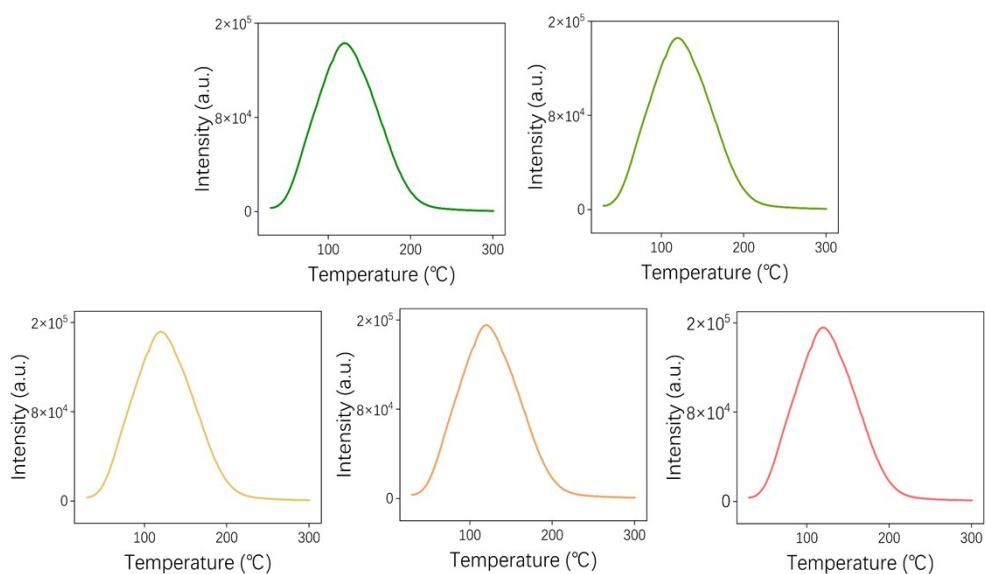

**Figure S35.** Thermal repeatability of the  $\text{SrGa}_{12-x}\text{Al}_x\text{O}_{19}: 4\%\text{Dy}^{3+}$  ( $x=3$ ) phosphor. TL-based temperature sensor was repeatedly checked via five cycle TL measurements. Phosphor was irradiated by 254 nm UV lamp and the heating rate was kept constant in each cycle.

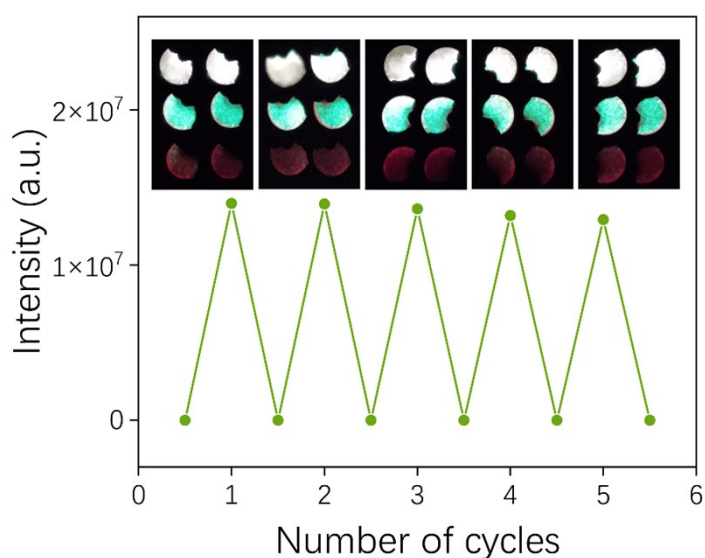

**Figure S36.** Thermal repeatability of the  $\text{SrGa}_{12-x}\text{Al}_x\text{O}_{19}: 4\%\text{Dy}^{3+}$  ( $x=3$ ) phosphor. TL-based temperature sensor was repeatedly checked via five cycle TL measurements. TL intensity was recorded as a function of number of cycles and the emission images were taken during the heating stage.

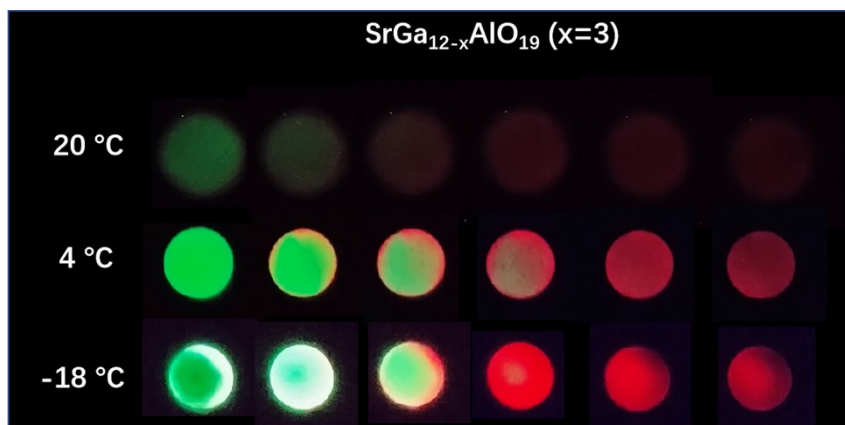

**Figure S37.** Photographs of  $\text{SrGa}_{12-x}\text{Al}_x\text{O}_{19}$  ( $x=3$ ) during thermally stimulated process. The sample was placed at varied ambient temperatures (at 20, 4, and  $-18$  °C, respectively) for 64 h after excitation by 10-min 254 nm irradiation.

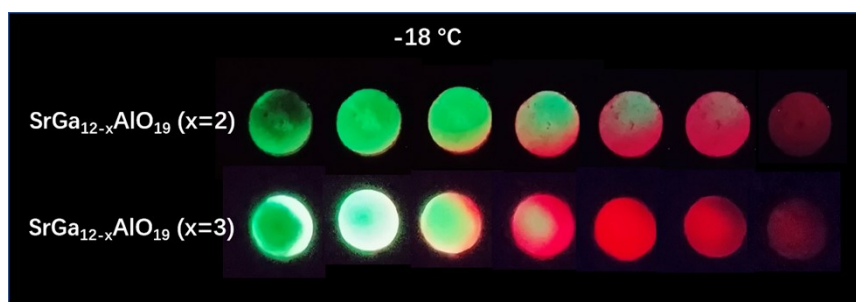

**Figure S38.** Comparison of  $\text{SrGa}_{12-x}\text{Al}_x\text{O}_{19}$  ( $x=2$ ) and  $\text{SrGa}_{12-x}\text{Al}_x\text{O}_{19}$  ( $x=3$ ) during thermally stimulated process. The samples were placed at  $-18$  °C for 64 h after excitation by 10-min 254 nm irradiation.
